# Supplementary material for: Structural characterisation of new RuII[9]aneS3 polypyridylic complexes †
Source: Royal Society of Chemistry journal article supplement (doi:10.1039/b004752j), 2000-01-01
Supplement: b004752j.doc [file b004752j.doc]

**Synthesis of Ru(II)[9]aneS3 polypyridylic complexes**

**[Ru([9]aneS3)(ind)Cl2] - 1 -** An excess of indazol (ind), (148 mg, 1.25 mmol) was added to 218 mg (0.51 mmol) of Ru(9aneS3)(dmso)Cl2in 40 ml of dearated ethanol under an argon atmosphere. The yellow mixture was refluxed for 12 h at 80C and an yellow/orange solution was obtained. After standing overnight an yellow microcrystalline solid was collected and washed with diethyl ether (90 mg, 38%). **ES**: m/z=435, Ru(9aneS3)(ind)Cl+; m/z=513, Ru(9aneS3)(ind)(dmso)Cl+. **1H NMR**:H (dmso-*d6*, 40°C), ppm: from the signals evolution (20 minutes to 5 weeks) only three peaks could be unambiguously assigned to complex 1, namely: 8.40 (s), 7.37 (t), 7.15 (t) (see NMR discussion for details).

**[Ru([9]aneS3)(pdi)Cl]Cl.1.25H2O - 2 -** An excess of 1,2-phenylenediamine (pda) (107 mg, 0.99 mmol) was added to 215 mg (0.50 mmol) of Ru(9aneS3)(dmso)Cl2in 20 ml of dearated aqueous ethanol under an argon atmosphere. The yellow mixture was refluxed for 12h at 80C changing to a dark purple solution. On standing, a dark purple micro-crystalline solid was obtained (167 mg, 70%). TG analysis: 1 H2O.

**[Ru([9]aneS3)(phi)Cl][PF6] - 3 -** A 5% excess of 9,10-diaminophenantrene (dap) (109 mg, 0.52 mmol) was added to 0.50 mmol (215 mg) of Ru(9aneS3)(dmso)Cl2in 15 ml of dearated ethanol under an argon atmosphere. The mixture was refluxed for 8 h at 85 C and a deep purple solution was obtained. After cooling, 250 ml of water were added and the solution was kept in contact with air during 24 h, with continuous stirring. The volume solution was reduced by evaporation and the addition of an excess of NH4PF6 produced an immediate formation of a precipitate. After standing overnight at 4°C the purple precipitate was filtered, repeatedly washed with diethyl-ether, re-dissolved in CH3CN, filtered, evaporated to dryness and dried (43 mg , 13 %).

**[Ru(9aneS3)(dpm)Cl][PF6] - 4 -** A slight excess of 2,2'-dipyridylmethane (dpm)
(88 mg, 0.52 mmol) was added to 215 mg (0.50 mmol ) of Ru(9aneS3)(dmso)Cl2in 15 ml of dearated ethanol under an argon atmosphere. The yellow mixture was refluxed at 85C for 4 hours and a dark red/brown solution was obtained. An excess of NH4PF6 was added to the solution with immediate turbidity and the formation of an ochre precipitate. After standing for three days at -20° C the precipitate was filtered, washed with diethyl-ether and dried (270 mg, 85 %). **13C NMR**: C (CD3CN), ppm: 159.1, 156.6, 139.2, 126.4, 124.7 (aromatic region), 46.6 (from CH2), 35.6, 33.2, 32.5 (macrocycle region).

**[Ru([9]aneS3)(dpk)Cl][PF6] - 5 -** The ligand 2,2'-dipyridylketone (dpk) (105 mg, 0.57 mmol) was added to (215 mg, 0.50 mmol ) of Ru(9aneS3)(dmso)Cl2in 40 ml of dearated ethanol under an argon atmosphere. The yellow mixture was refluxed for 1 hour at 80C and after evaporation a red/brown solid obtained. The solid was washed with acetone and dried, dissolved in ethanol and precipitated with an excess of NH4PF6. The bright orange PF6- salt was dissolved in CH3CN and re-crystallised by slow diethyl-ether diffusion. Small thin bright red needles were obtained (44 mg, 13.5 %).

**[Ru([9]aneS3)(dipa)Cl][PF6] - 6 -** 86 mg (0.502 mmol) of 2,2'-dipyridylamine (dipa) were added to 215 mg (0.50 mmol) of Ru(9aneS3)(dmso)Cl2in 40 ml of dearated ethanol under an argon atmosphere. The yellow mixture was refluxed for 1 hour at 80C and isolated as an yellow powder. To an aqueous solution of the compound a saturated solution of NH4PF6 was added and immediately a light yellow solid formed. The PF6- salt obtained was then dissolved in CH3CN and re-crystallised by slow diethyl-ether diffusion. (bright yellow-orange crystals) (152 mg, 45%). **1H NMR** and **FT-IR** (Cl- salt).

**[Ru([9]aneS3)(bpym)Cl][PF6].H2O -7 -** A yellow aqueous ethanol solution (50 ml) of
[Ru([9]aneS3)(dmso)Cl2] (215 mg; 0.5 mmol), previously dearated with N2, was added dropwise over 3.5 hours to a solution (10 ml) of 2,2'-bipyrimidine (0.5 mmol dearated and under an Ar atmosphere) in ethanol. The reaction, at 90°C, was continued for a further 4 hours. During the reaction the solution changed from bright red to a darker brown colour. This solution was kept at room temperature overnight, reduced in volume to 20 ml and filtered. The compound was precipitated with an excess of NH4PF6, kept at
-20°C overnight, filtered, washed with cold water, cold ethanol and diethyl-ether and dried (286 mg, 90%).

**Ru(9aneS3)(tpy)Cl][PF6].1.5H2O - 8 -** 2,2':6',2''- terpyridine (116 mg, 0.50 mmol) was added to Ru(9aneS3)(dmso)Cl2(215 mg, 0.50 mmol) in 15 ml of dearated aqueous ethanol, under an argon atmosphere. The yellow solution rapidly changed to deep orange and was left under reflux for 4 hours at 85C. The addition of NH4PF6 gave an intense orange coloured precipitate. After standing overnight at -20°C the solution was filtered and a micro-crystalline powder was obtained (305 mg, 76 %).

**Ru(9aneS3)(bq)Cl[PF6].H2O - 9 -** 2,2'-biquinoline (bq) (103 mg, 0.40 mmol ) was added to 172 mg (0.40 mmol) of Ru(9aneS3)(dmso)Cl2in 45 ml of dearated ethanol under an argon atmosphere. The orange mixture was refluxed for 18 h at 95C and a dark red/ purple solution with an orange precipitate was obtained. After cooling, the solution was filtered twice, to remove both unreacted reagent and ligand. Following NH4PF6 addition, the solution was kept at -20°C overnight resulting in a dark red/purple precipitate and a green solution. The solid was filtered, dissolved in CH3CN, filtered again and concentrated by evaporation. Diethyl ether addition precipitated a solid that was vacuum filtered and dried resulting in a purple powder (28mg, 10 %).

**Ru(9aneS3)(5-phen)Cl[PF6] - 10 -** 5-phenyl-1,10-phenantroline (128 mg, 0.50 mmol) was added to 215 mg (0.50 mmol) of Ru(9aneS3)(dmso)Cl2in 15 ml of dearated ethanol. The yellow mixture was refluxed for 4 h at 85C and an orange solution obtained. An equimolar quantity of NH4PF6 was added with immediate turbidity. After being kept overnight at -20°C the solution was filtered. The solid was washed with diethyl-ether and dried (309 mg, 86%).

**Ru(9aneS3)(5,6-dione)ClCl.H2O - 12 -** A slight excess of 1,10-phenanthroline-5,6-dione (5,6-dione) (109 mg, 0.52 mmol) was added to 0.5 mmol (215 mg) of Ru(9aneS3)(dmso)Cl2in 15 ml of dearated ethanol. The yellow mixture was refluxed for 6 h at 95 C and a dark brown solution was obtained. On standing overnight at -20° C a golden brown micro-crystalline powder was obtained. After filtration the solid was repeatedly washed with diethyl-ether and dried (289 mg, 99 %).

**Ru(9aneS3)(dppz)Cl[PF6] - 13 -** dipyrido [3,2-a:2',3'-c] phenazine (55 mg, 0.20 mmol) was added to (108 mg, 0.25 mmol) of Ru(9aneS3)(dmso)Cl2 in 50 ml of ethanol. The yellow resulting mixture was refluxed for 6 hours at 80ºC. After cooling the solution, a red/orange gelatinous solid was obtained. A concentrated aqueous solution of NH4PF6was added with immediate precipitation of an orange solid. After filtration it was washed with ethanol and diethyl ether (56 mg, 33 %). **1H NMR** and **UV/Vis** (Cl- salt).

**Ru(9aneS3)(dhmf)Cl[PF6].0.4dhmf 14 -** An excess of 6,7-dihydro-5,8-dimethyldibenzo [b.j.]-1,10-phenantroline (373 mg, 1.20 mmol) was mixed with Ru(9aneS3)(dmso)Cl2 (215 mg, 0.50 mmol) in 40 ml of dearated ethanol, under an argon atmosphere. The resulting yellow/orange solution was refluxed for 7 hr at 80C changing to a dark red/purple colour. A slight excess of NH4PF6 was then added causing immediate precipitation. This solid was dissolved in CH3CN and re-crystallised by slow diethyl-ether diffusion. The compound, in the PF6- form, proved to have an excess of the polypyridyl ligand, which could not be removed by repeated sequences of dissolution, filtration and re-crystallisation steps (36 mg, 8 %).

The analytical and spectroscopic data are given in Table S5.
