# Supplementary material for: Structural characterisation of new RuII[9]aneS3 polypyridylic complexes †
Source: Royal Society of Chemistry journal article supplement (doi:10.1039/b004752j), 2000-01-01
Supplement: figs1.doc [file figs1.doc]

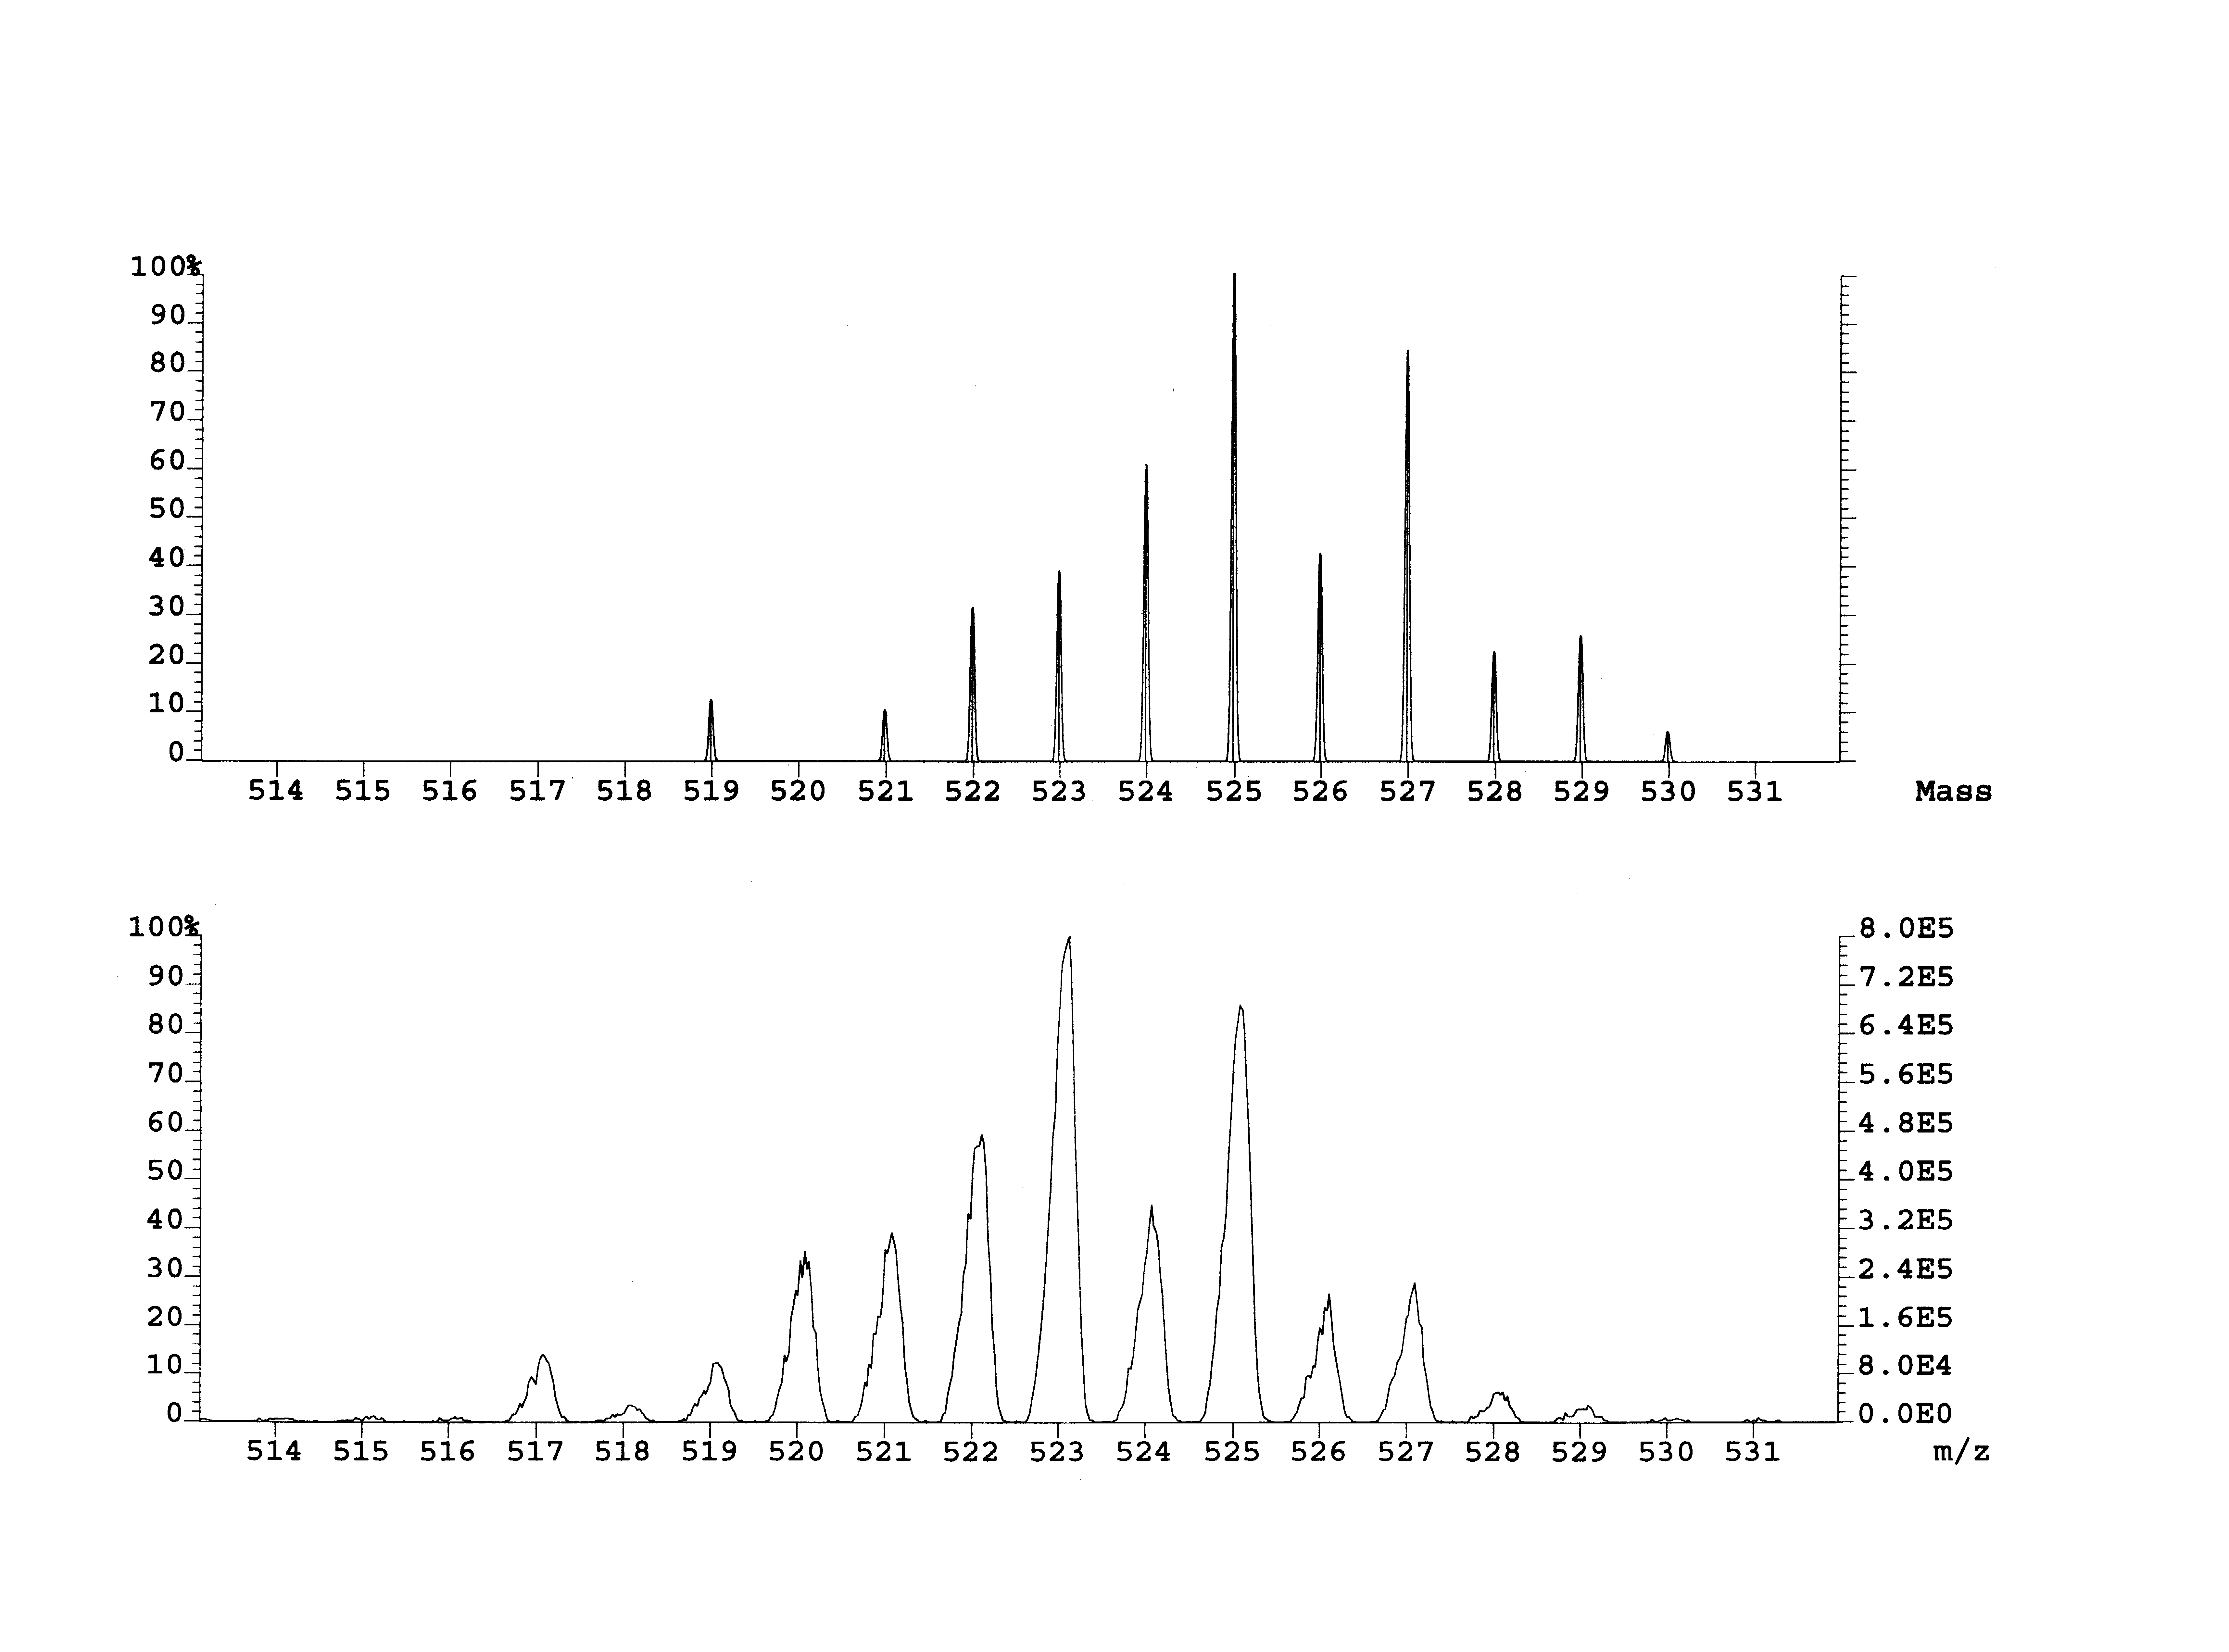


**b)**

**a)**

**Fig. S1.** ES-MS spectra of [Ru([9]aneS3)(dap)Cl]+: a) calculated pattern and b) experimental results for the molecular ion [M]+. The two mass unit difference corresponds to the oxidation of **dap** to the diimine form **phi**.
