# Supplementary material for: Structural characterisation of new RuII[9]aneS3 polypyridylic complexes †
Source: Royal Society of Chemistry journal article supplement (doi:10.1039/b004752j), 2000-01-01
Supplement: figs3.doc [file figs3.doc]

.


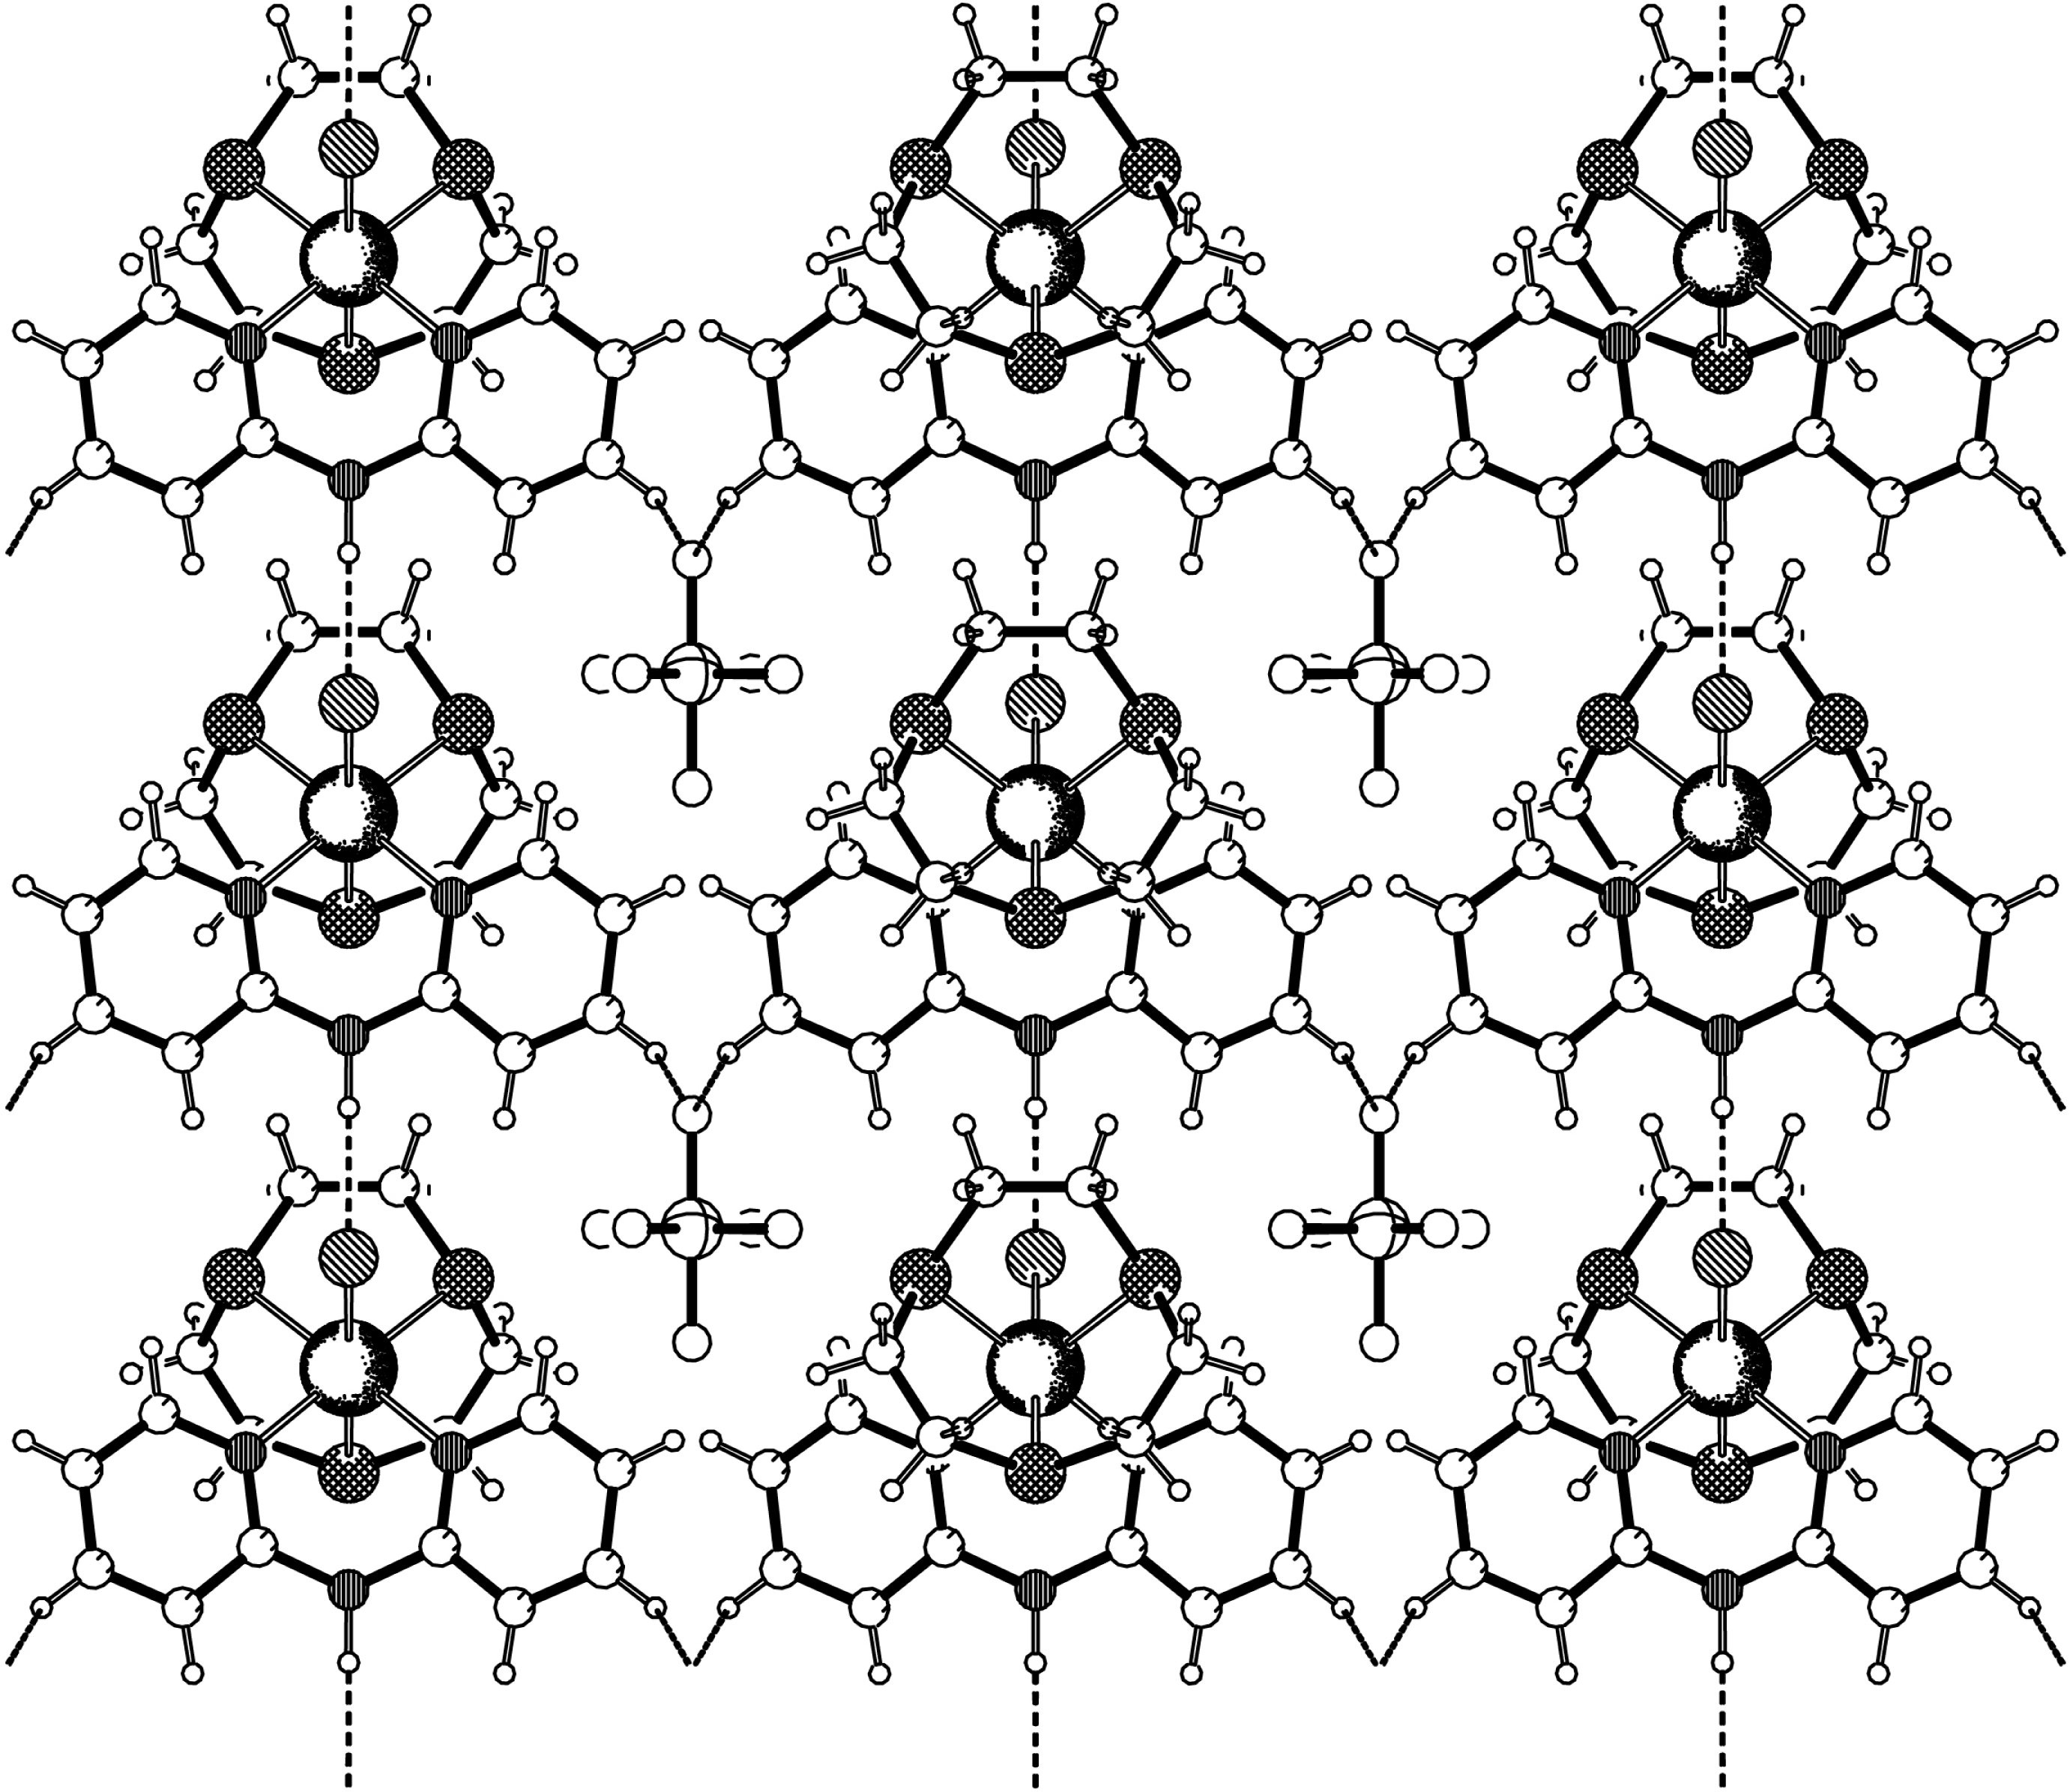


**Fig. S3**. Crystal packing diagram of[Ru([9]aneS3)(dipa)Cl]PF6 **6** showing the larger rings formed by four complex units and two BF4- anions
