# Supplementary material for: Structural characterisation of new RuII[9]aneS3 polypyridylic complexes †
Source: Royal Society of Chemistry journal article supplement (doi:10.1039/b004752j), 2000-01-01

**Fig. S4**. Crystal-packing diagram of [Ru([9]aneS3)(bpym)Cl]PF6 **7** showing the crystallographic motif derived from hydrogen bonds.


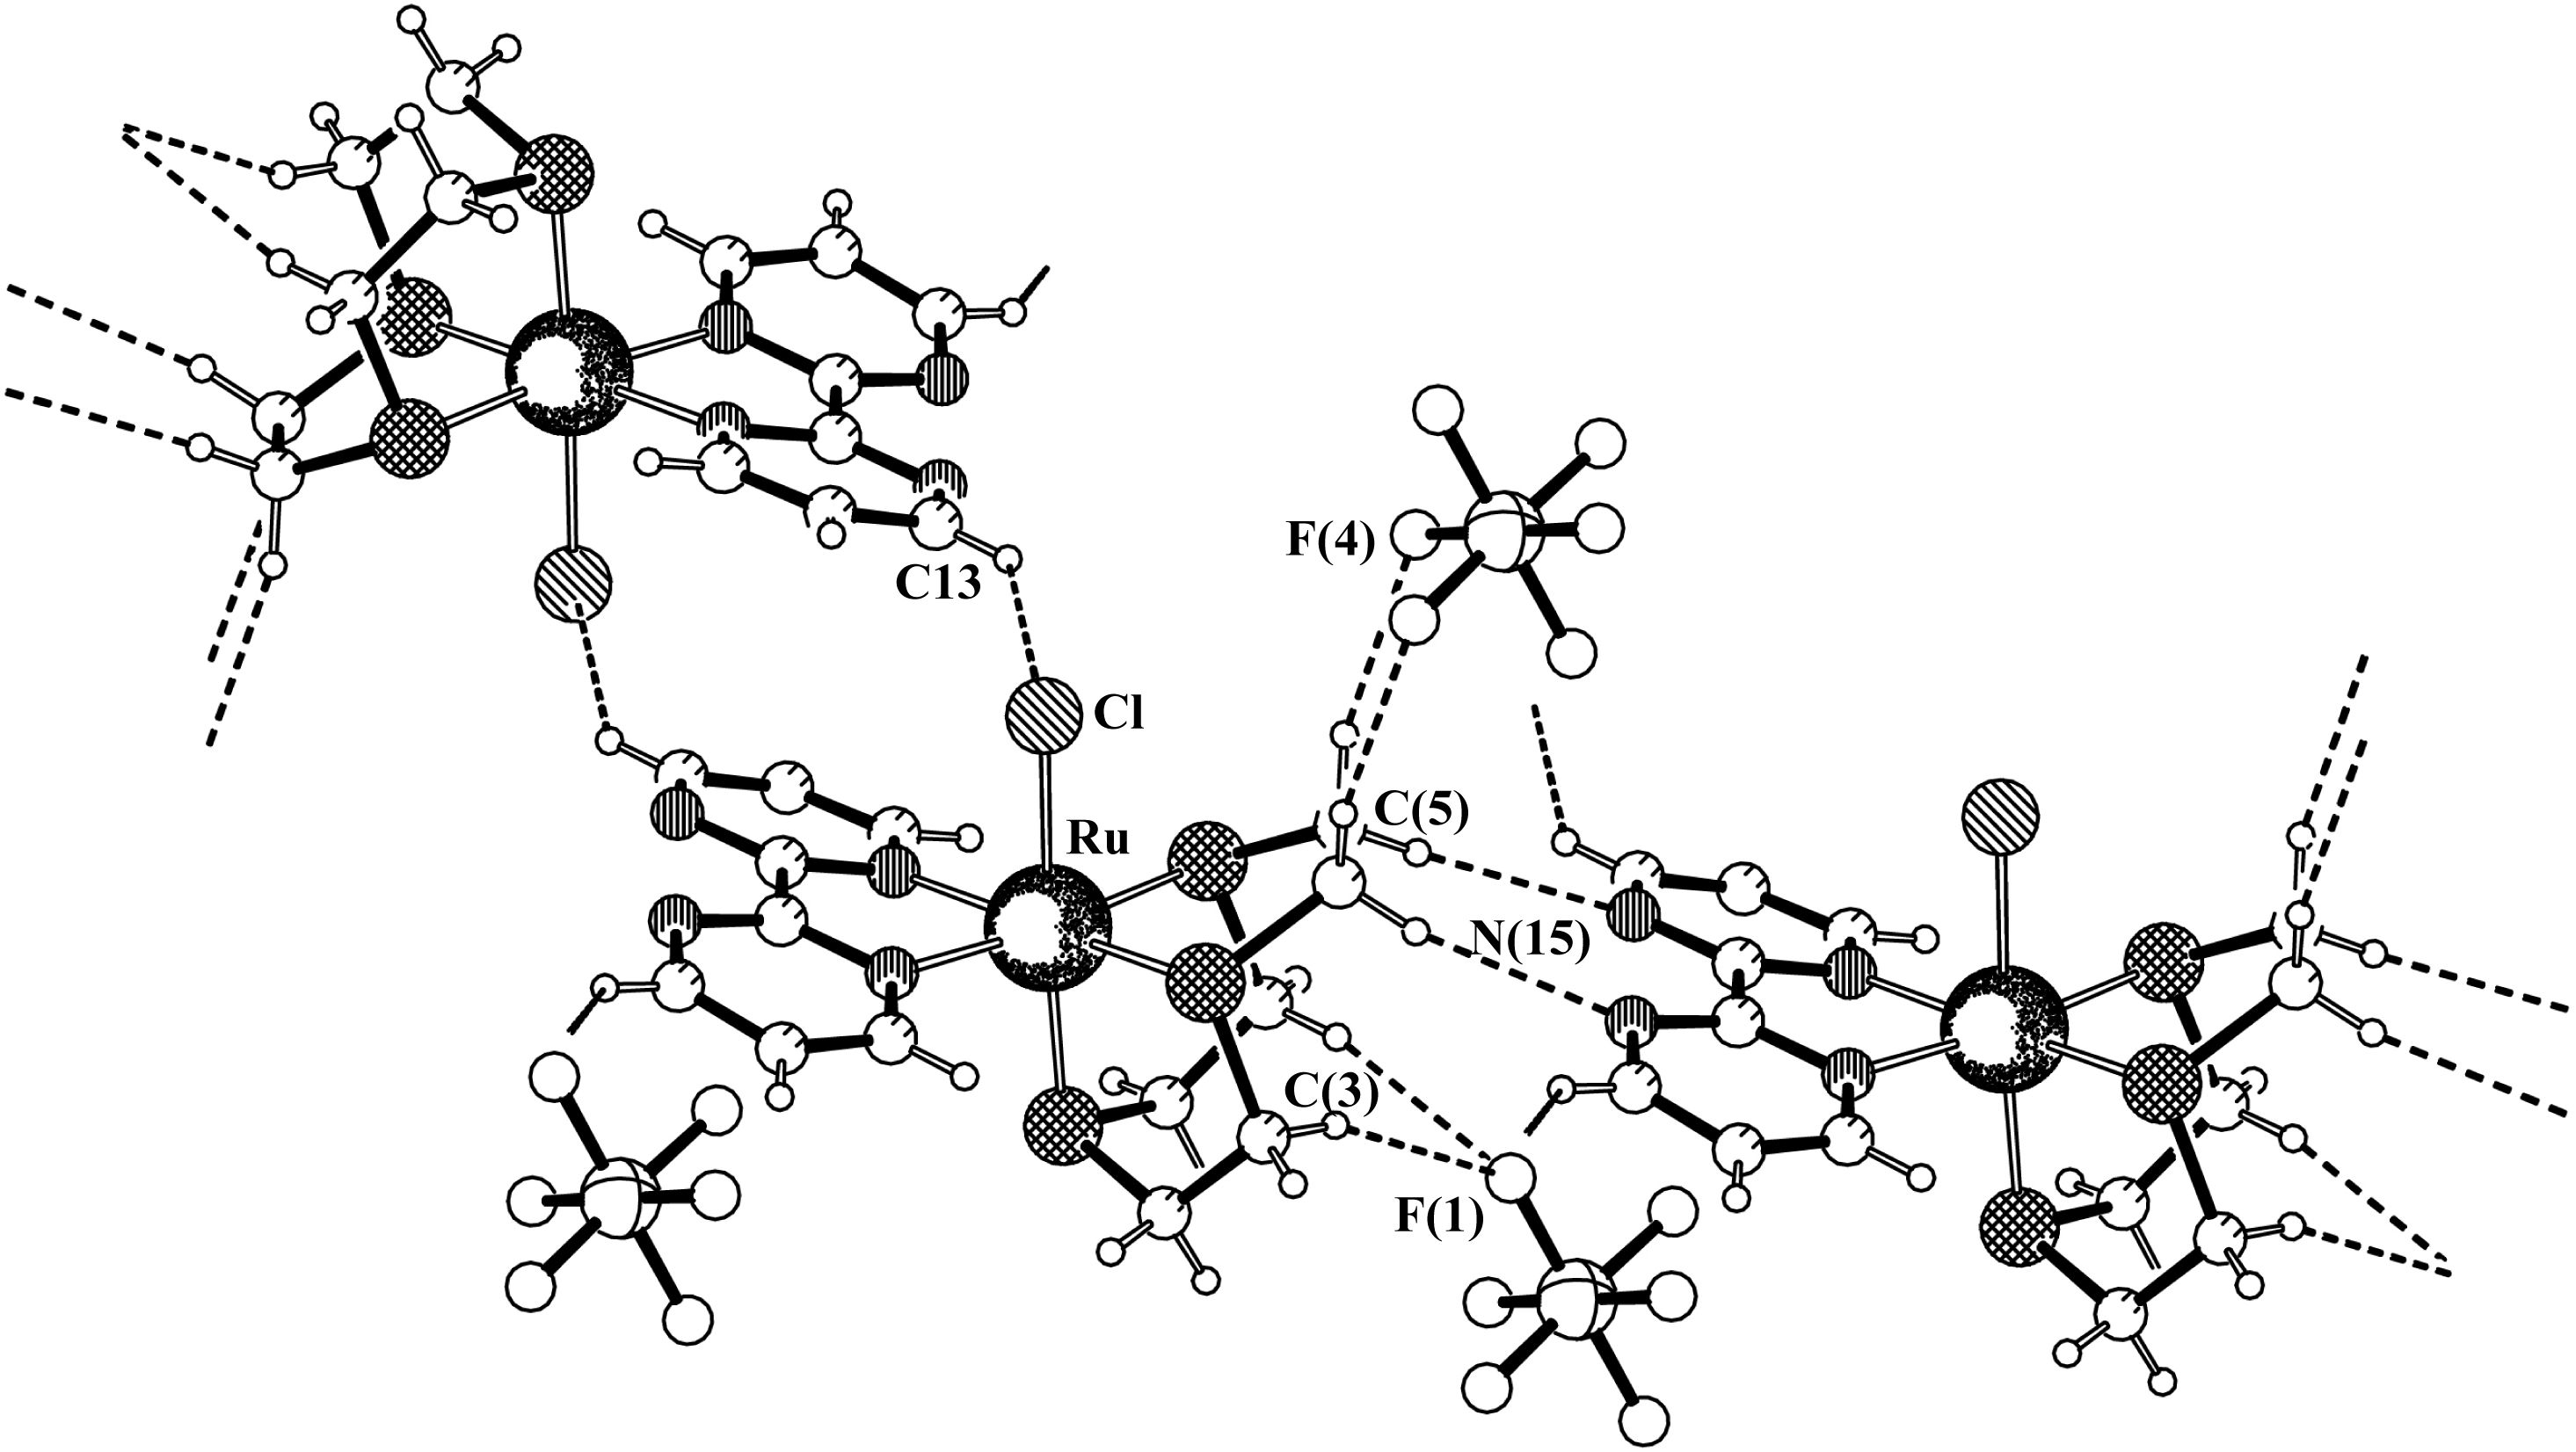

Supplement: figs4.doc [file figs4.doc]
