# Supplementary material for: Structural characterisation of new RuII[9]aneS3 polypyridylic complexes †
Source: Royal Society of Chemistry journal article supplement (doi:10.1039/b004752j), 2000-01-01
Supplement: tables3.doc [file tables3.doc]

**Table S3**. Dimensions of the hydrogen bonds in metal complexes **6, 8** and **11**.

| *Complex* | Hydrogen bonds | | |
| --- | --- | --- | --- |
|  | H…A /Å | D...A /Å | H..A…D /º |
| [Ru([9]aneS3(dipa)Cl]PF6 6 |  |  |  |
| N(31)-H(31)...Cl [-1+*x*,*y*,*z*] | 2.35(3) | 3.212(9) | 174(7) |
| C(14)-H(14)...F(2) [1-*x*,1-*y*,1/2+*z*] | 2.54 | 3.169(9) | 125.0 |
| [Ru([9]aneS3(bpym)Cl]PF6 **7** |  |  |  |
| C(3)-H(3B)...F(1) [x,y,1+z] | 2.44 | 3.365(9) | 159.3 |
| C(5)-H(5A)...N(15) [*x*,*y*,1+*z*] | 2.48 | 3.431(8) | 168.4 |
| C(5)-H(5B)...F(4) [1+*x*,*y*,1+*z*] | 2.40 | 3.322(10) | 158.2 |
| C(13)-H(13)...Cl [1-*x*,-1/2+*y*,-*z*] | 2.80 | 3.492(7) | 132.2 |
| [Ru([9]aneS3(tpy)Cl]PF6 **8** |  |  |  |
| C(3)-H(3A)...F(4) [1/2-*x*,1/2+*y*,*z*] | 2.37 | 3.343(11) | 176.8 |
| C(5)-H(5B)...N(31) [1/2-*x*,1/2+*y*,*z*] | 2.55 | 3.360(10) | 140.5 |
| C(6)-H(6A)...F(5) [1/2-*x*,-*y*,-1/2+*z*] | 2.38 | 3.347(9) | 174.2 |
| C(23)-H(23)...F(4) [1/2+*x*,-1/2-y,1-*z*] | 2.39 | 3.254(8) | 154.7 |
| C(25)-H(25)...Cl [1-*x*,-1/2+*y*,1/2-*z*] | 2.80 | 3.470(7) | 130.3 |
| C(36)-H(36)...F(5) [*x*,-1/2-*y*,-1/2+*z*] | 2.53 | 3.401(10) | 156.0 |
| [Ru([9]aneS3(dip)Cl]BF4 **11** |  |  |  |
| C(3)-H(3B) ...F(2)[ -1+*x*,*y*,*z*] | 2.45 | 3.400(14) | 168.5 |
| C(6)-H(6B) ...F(2) [-1+*x*,*y*,*z*] | 2.53 | 3.480(15) | 165.2 |
| C(12)-H(12) ...F(1) [-1/2+*x*,-1/2-*y*,-*z*] | 2.45 | 3.298(11) | 151.3 |
