# Supplementary material for: Structural characterisation of new RuII[9]aneS3 polypyridylic complexes †
Source: Royal Society of Chemistry journal article supplement (doi:10.1039/b004752j), 2000-01-01
Supplement: tables4.doc [file tables4.doc]

| **Table S4**.Room temperature crystal data and selected refinement parameters for complexes **6**-**11** and **13**. | | | | | | |
| --- | --- | --- | --- | --- | --- | --- |
| Complex | 6 | **7** | 8 | **9** | **11** | **13** |
| Empirical formula | C16H21ClF6N3PRuS3 | C14H18ClF6N4PRuS3 | C21H23ClF6N3PRuS3 | C26H27ClF6N3PRuS3 | C30H28BClF4N2RuS3 | C24H22.12ClF6N4O0.12PRuS3 |
| M | 633.03 | 619.99 | 695.09 | 759.18 | 736.05 | 746.25 |
| Crystal system | Orthorhombic | Monoclinic | Orthorhombic | Monoclinic | Orthorhombic | Monoclinic |
| Space group | Pbcm | *P*21/*m* | Pbca | *P*21/*n* | *P*212121 | *P*21/c |
| *a* / Å | 7.698(11) | 8.914(11) | 14.866(17) | 7.930(11) | 8.158(10) | 7.619(11) |
| *b* / Å | 15.134(17) | 11.821(14) | 17.311(20) | 30.024(37) | 15.575(17) | 30.542(34) |
| *c* /Å | 19.061(23) | 10.167(13) | 20.639(24) | 12.918(14) | 24.244(26) | 25.273(28) |
| ** /º | (90.0) | 101.37(1) | (90.0) | 105.75(1) | (90.0) | 96.70(1) |
| *V* /Å3 | 2221(5) | 1050(2) | 5311(11) | 2960(6) | 3080(6) | 5841(12) |
| Z | 4 | 2 | 8 | 4 | 4 | 8 |
| *D*c /gcm-3 | 1.893 | 1.960 | 1.739 | 1.703 | 1.587 | 1.697 |
| ** (mm-1) | 1.241 | 1.311 | 1.046 | 1.003 | 0.848 | 0.959 |
| Reflections collected | 3769 | 3716 | 16364 | 5732 | 6794 | 17917 |
| Unique reflections | 1810 (*R*int= 0.0515) | 2145 (*R*int= 0.0464) | 5069 (*R*int= 0.0369) | 3297 (*R*int = 0.0929) | 3971 (*R*int = 0.0247) | 9949 (*R*int = 0.1585) |
| *R* and *R*w [*I*>2(*I*)] | 0.0446, 0.1197 | 0.0478, 0.1041 | 0.0462, 0.1132 | 0.0936, 0.2305 | 0.0448, 0.1150 | 0.1243, 0.2840 |
| (all data) | 0.0634, 0.1296 | 0.0733, 0.1131 | 0.0742, 0.1249 | 0.2181, 0.2801 | 0.0615, 0.1286 | 0.2446, 0.3389 |
