# Supplementary material for: Structural characterisation of new RuII[9]aneS3 polypyridylic complexes †
Source: Royal Society of Chemistry journal article supplement (doi:10.1039/b004752j), 2000-01-01
Supplement: tables5.doc [file tables5.doc]

**Table S5. Analytical and spectroscopic data for synthesised complexes**

| Compound | **ES** | **Mycroanalysis (% w/w)** found *vs* calculated (on italic) | | | | **UV/Vis†** max, nm (103M-1cm-1) | **FTIR** cm-1 | **1H-NMR** (ppm), J (Hz) |
| --- | --- | --- | --- | --- | --- | --- | --- | --- |
| [Ru([9]aneS3)(ind)Cl2] **1** | 435 | 33.7 *33.2* | 3.8 *3.9* | 5.9 *6.0* | 20.9 *20.4* | 400 (1.2), 322 (9.3), 297 (7.6), 255 (5.8) | N-H (3246 s,br) N-H (1505 m) Ru-S (432 s) Ru-Cl (274 m) | 8.40 (s), 7.37 (t), 7.15 (t) |
| [Ru([9]aneS3)(pdi)Cl]Cl.1.25H2O **2** | 423 | 29.5 *30.0* | 4.2 *4.3* | 5.5 *5.8* | 20.1 *20.0* | 650 (1.0) sh, 532 (15.6), 380 (1.4), 305 (2.2) sh, 224 (19.4) sh, 195 (46.7) | N-H (3250-2800, s br), N-H (1523 m), Ru-S (453 m) Ru-Cl (276 w) | 12.68 (1H, s, N-H), 12.60 (1H, s, N-H), 6.91 (2H, m), 6.75 (2H, m), [3.10-2.95] (2H, m), [2.85-2.60] (6H,m), [2.60-2.40] (4H, m) |
| [Ru([9]aneS3)(phi)Cl][PF6] **3** | 523 | 36.6 *36.0* | 3.2 *3.3* | 4.0 *4.2* |  | 645 (1.0) sh, 555 (16.2), 412 (1.1), 304 (14.1), 259 (25,7), 217 (42.8) | N-H (3318w, 3208m) C=N (1602 m), N-H (1497 m) Ru-S (424 w) Ru-Cl (278w) | 12.68 (2H, s, N-H), 8.40 (2H, d), 8.29 (2H, d), 7.65 (2H, t), 7.55 (2H, t), 3.30-3.15 (2H, m), 3.05-2.90 (2H, m), 2.85-2.60 (8H, m) |
| [Ru(9aneS3)(dpm)Cl][PF6] **4** | 487 | 32.6 *32.3* | 3.2 *3.5* | 4.4 *4.4* | 15.5 *15.2* | 400 (1.25)sh, 340 (6.7), 300 (4.7 )sh, 249 (8.6), 196 (47.0) | CH2(dpm) (1439 s), Ru-S (459 w, 449 w), Ru-Cl (280 w) | 9.20 (H6,6';d), 7.84 (H5,5';t), 7.56 (H3,3';d), 7.35 (H4,4';t), 5.36 (1H, CH2;d), 4.38 (1H, CH2; d), [3.10-2.95] (2H, m), [2.70-2.55] (2H,m), [2.55-2.35] (8H,m) |
| [Ru([9]aneS3)(dpk)Cl][PF6] **5** | 501 | 30.9 *31.6* | 3.1 *3.1* | 4.3 *4.3* |  | 510 (1.8) sh, 454 (2.4), 326 (6.9) sh, 280 (13.0), 195 (57.0) | C=O (1673 s), C-(C=O)-C (1306 m), Ru-S (496vw, 470 vw), Ru-Cl (282 w) | 9.26 (2H, m), 8.09 (4H, m), 7.68 (2H, m), 3.20-3.00 (2H, m), 2.80-2.65 (2H, m), 2.55-2.35 (4H, m), 2.35-2.10 (4H, m) |
| [Ru([9]aneS3)(dipa)Cl][PF6] **6** | 488 | 28.4 *28.5* | 3.2 *3.3* | 7.0 *6.8* |  | 394 (1.8) sh, 327 (7.5) sh, 286 (20.9) sh, 242 (22.2), 195 (107.6) | N-H (3364w, 3271w, 3210) N-H (1527 m), C-N(1354s) Ru-S (465w, 445 w), Ru-Cl (283 w, 272 vw) | 9.63 and 9.48 (1H, s s), 8.58 (2H, t), 7.62 (2H, m), 6.93 (4H, m), 2.85-2.65 (2H, m) 2.60-2.40 (2H, m), 2.40-2.10 (6H, m) and 2.10-1.95 (2H, m) |
| [Ru([9]aneS3)(bpym)Cl][PF6].H2O **7** |  | 26.8 *26.4* | 3.1 *3.2* | 8.7 *8.9* |  | 464 (2.61), 353 (5.23), 258 (13.5), 236 (19.9), 198 (41) | Ru-S (458 w), Ru-Cl (290w, 277w) | 9.23 (H6,6', dd, J6-5 = 5.7, J6-4 = 2.0), 9.13 (H4,4',dd,J4-5 = 4.7, J4-6 = 2.0), 7.70 (H5,5', t, J5-4(6) = 5.3), [3.10-2.95] (2H, m), [2.95-2.80] (2H, m), [2.75-2.60 (6H, m), [2.60-2.50] (6H, m) |
| Ru(9aneS3)(tpy)Cl][PF6].1.5H2O **8** | 550 | 34.9 *34.9* | 3.4 *3.6* | 5.4 *5.8* | 13.7 *13.3* | 461 (3.3), 304 (22.5), 274 (8.0) sh, 258 (10.7) | Ru-S (468 w and 427 vw), Ru-Cl (283 vw) | 9.20 (H6, dd), 8.75 (H6'', ddd), 8.65  (H3', dd), 8.58 (H3, dt), 8.22 (H4',t), 8.19 (H4, td), 8.15 (H3'', dd), 7.95 (H4'', t), 7.75 (H5', dd), 7.70 (H5, t), 7.65 (H5'', t) |
| Ru(9aneS3)(bq)Cl[PF6].H2O **9** | 573 | 39.2 *39.2* | 3.9 *3.6* | 3.7 *3.8* | 13.1 *13.1* | 551 (5.2), 493 (3.1) sh, 376 (18.4), 358 (20.4), 326 (21.1), 266 (36.4), 210 (49.8) | Ru-S (426 w and 419 w), Ru-Cl (279 w) | 9.61 (2H, d), 8.82 (2H, d), 8.74 (2H, d), 8.17 (2H, d), 8.01 (2H, t), 7.86 (2H, t), 3.26-3.16 (2H, m), 3.02-2.93 (2H, m), 2.78-2.69 (2H, m), 2.56-2.47 (2H, m), 2.32-2.23 (2H, m), 1.90-1.81 (2H, m) |
| Ru(9aneS3)(5-phen)Cl[PF6] **10** | 573 | 40.2 *40.1* | 3.4 *3.4* | 3.8 *3.9* |  | 445 (5.5), 400 (4.8) sh, 310 (7.5) sh, 295 (10.6) sh, 274 (34.8), 235 (34.6) sh, 225 (36.2), 208 (45.0) | Ru-S (434 w)  Ru-Cl (283 w) | 9.37 (2H, t), 8.64 (1H, d), 8.51 (1H, d), 8.13(1H, s), 7.94 (1H, dd), 7.87 (1H, dd), 7.63 (5H, m), 3.06 (2H, m), 2.93 (2H, m), 2.69 (4H, m), 2.54 (4H, m) |
| Ru(9aneS3)(5,6-dione)ClCl.H2O **12** | 527 | 36.9 *37.2* | 3.3 *3.5* | 4.6 *4.8* | 17.3 *16.6* | 419 (3.3), 305 (10.3) sh, 295 (11.8), 250 (11.7) sh, 200 (35.2) | C=O (1690 s), C-(C=O)-C (1295 m), Ru-S (469 w) | 9.20 (2H, d), 8.56 (2H, d), 7.84 (2H, t); 3.00-2.65 (12H, m) |
| Ru(9aneS3)(dppz)Cl[PF6] **13** | 599 | 38.6 *38.7* | 3.1 *3.0* | 7.7 *7.5* |  | 414 (5.9) sh, 357 (14.0), 316 (13.8) sh, 276(55.8), 205 (44.8) | Ru-S (428 w) Ru-Cl (282 vw) | 9.61(H1, H8; dd) 9.50 (H3,H6; dd), 8.27 (H10, H13; m), 8.09 (H11, H12; m), 7.99 (H2,H7; m), [3.25 - 3.00] (4H, m), [3.00 - 2.65] (8H, m) |
| Ru(9aneS3)(dhmf)Cl[PF6].0.4dhmf **14** | 627 | 49.4 *49.5* | 4.4 *4.2* | 4.7 *4.4* |  | 543, 384, 370, 302, 290 sh, 261, 218 sh, 205 | Ru-S (468w and 452w) Ru-Cl (278w)  PF6- (839 vs, 557 s ) | Co-ordinated dhmf (9.38 (2H, d), 8.17 (2H, d), 7.83 (2H, t), 7.74 (2H, t), 3.38 (CH3, s), 2.74 (CH2, s)) 3.35-3.20 (2H, m), [3.10-2.95] (2H, m), [2.70-2.55] (2H, m), [2.40-2.25] (2H, m), [2.15-2.05] (2H, m), [1.60-1.50] (2H, m) Uncoordinated dhmf (8.32 (4H, dd), 7.97 (2H, t), 7.83 (2H, t), 3.38 (CH3, s), 2.84 (CH2, s)) |

**†**The complexes **4**, **6**-**8**, **10**-**13** and **15**-**16** display absorptions due to MLCT bands and appear *ca*. 400-465 nm Complexes **2**-**3**, **5**, **9** and **14**, however, have MLCT bands which exhibit a red-shift due to an increase of the p-acceptor character or aromatic extension of the polypiridylic ligand.
