# Supplementary figures and images for: Structural characterisation of new RuII[9]aneS3 polypyridylic complexes †
Source: Royal Society of Chemistry journal article supplement (doi:10.1039/b004752j), 2000-01-01

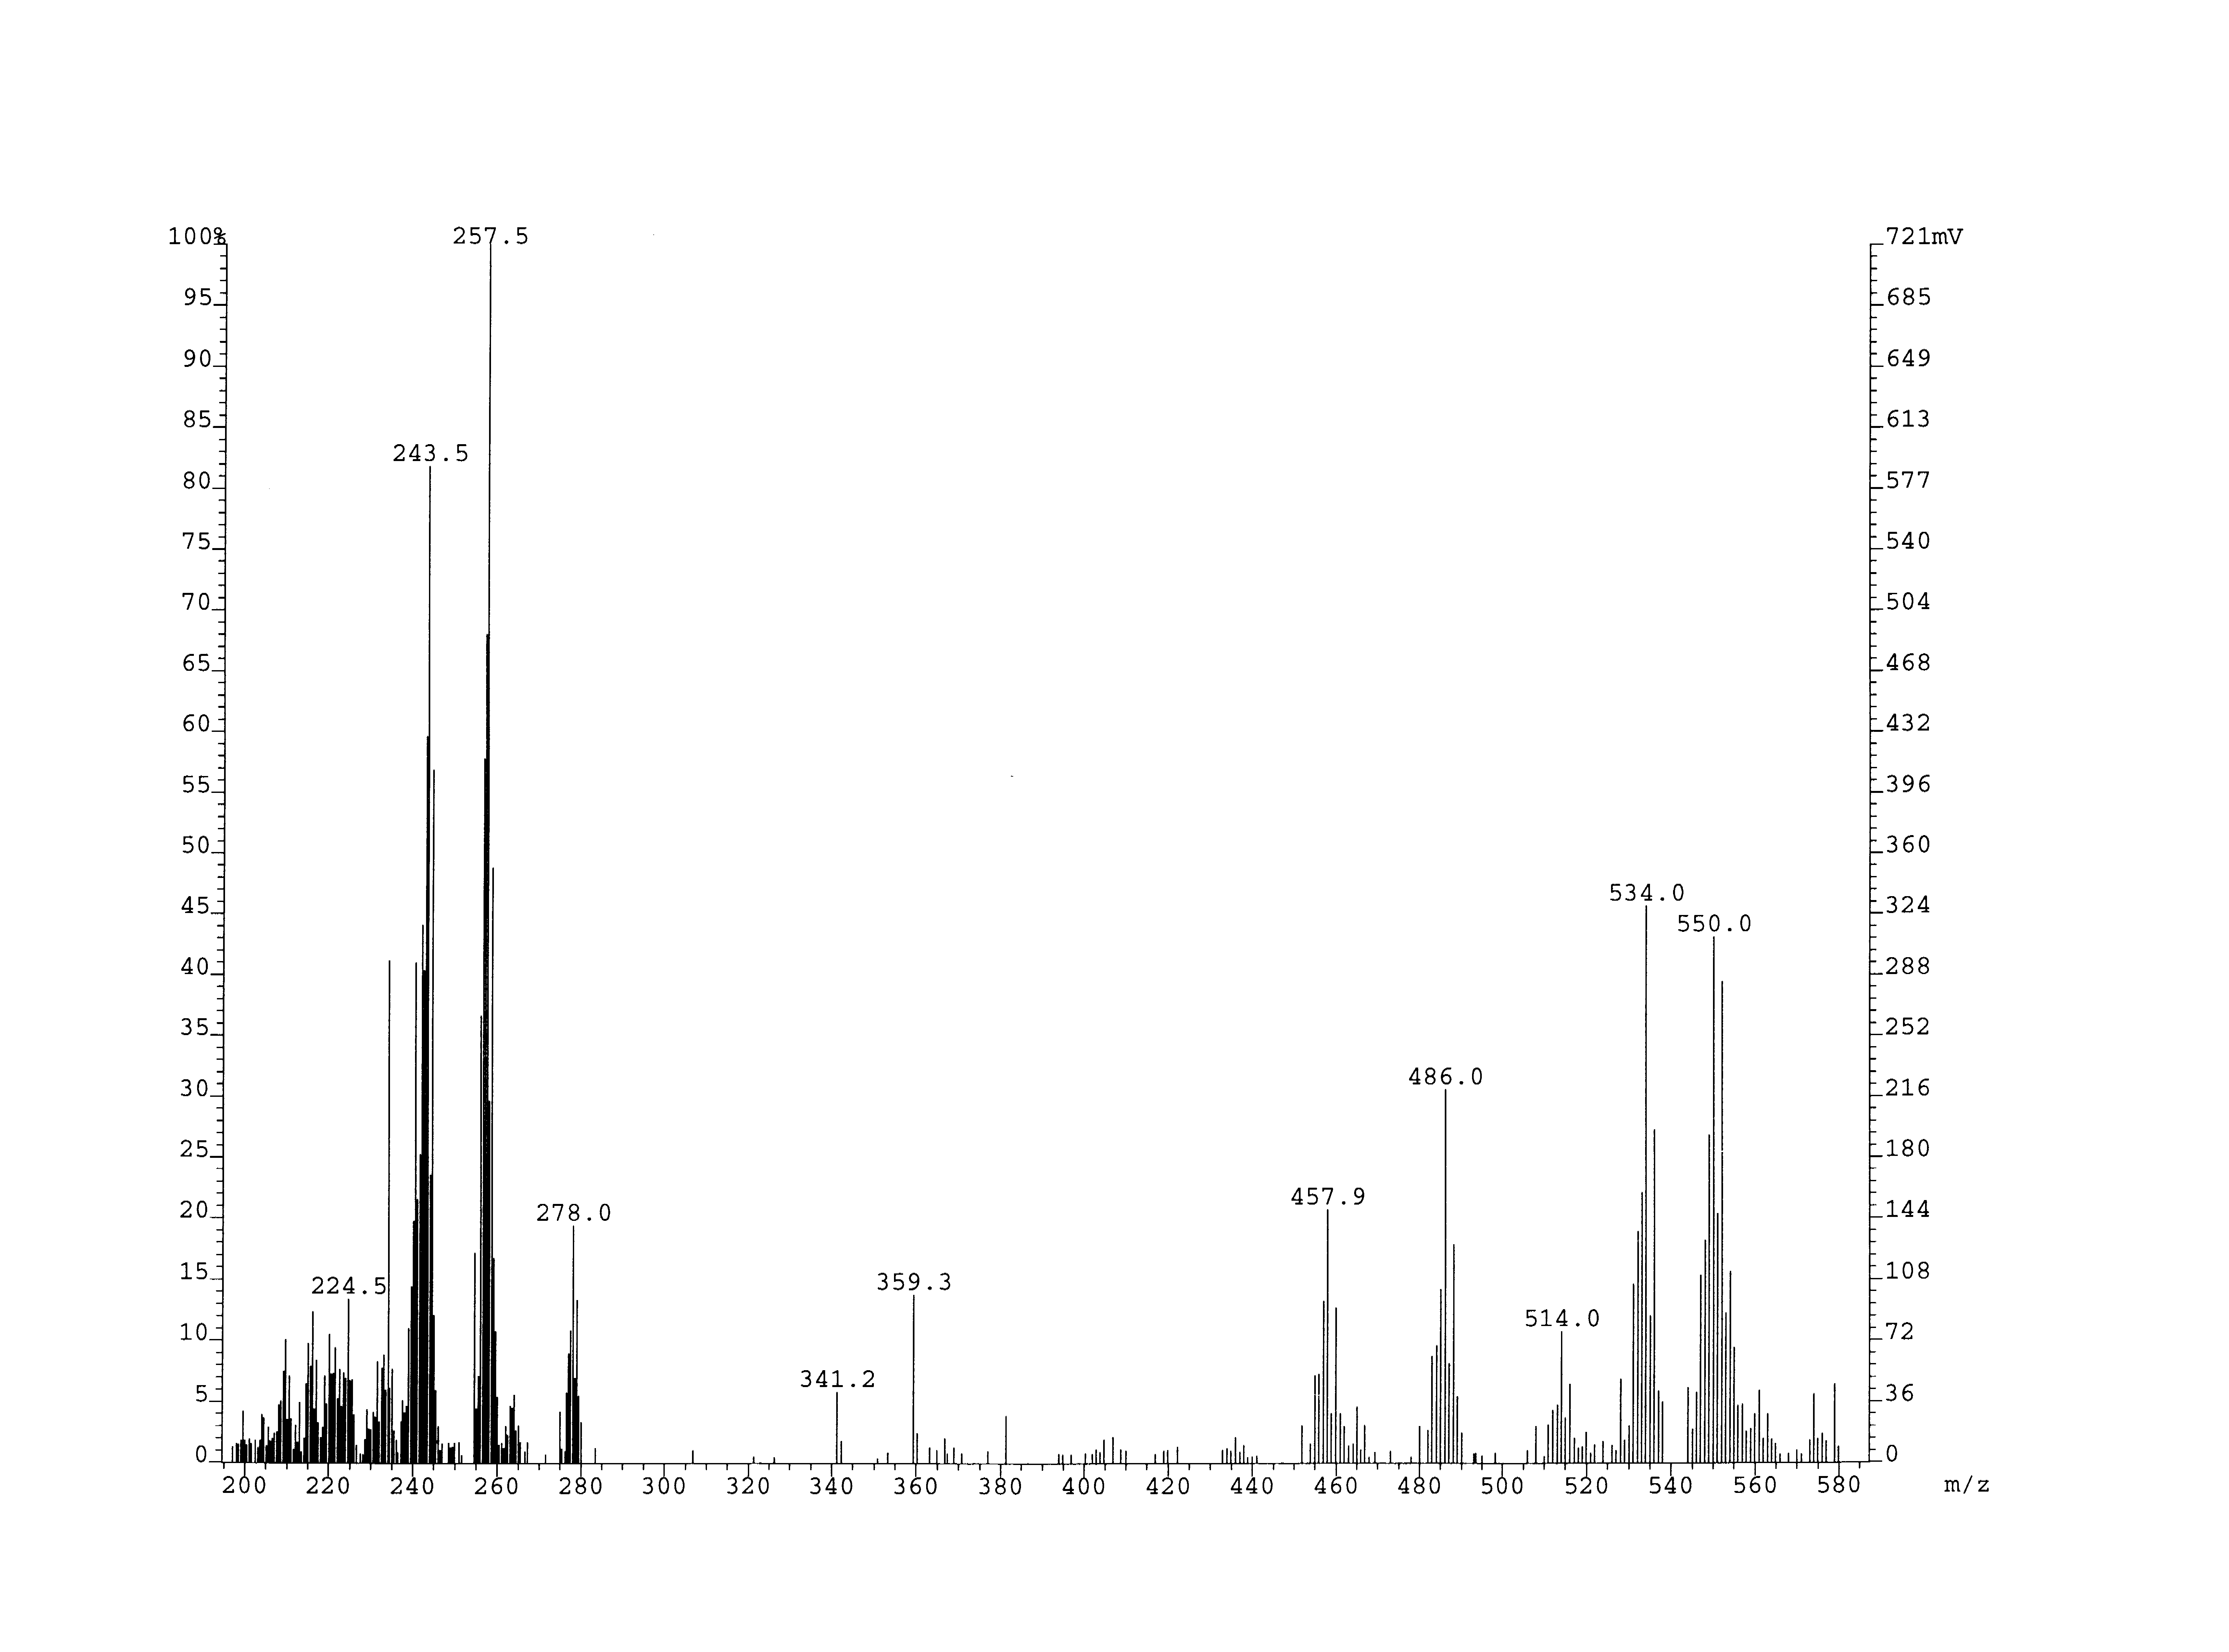


**Fig. S2**. ES-MS spectra of complex Ru(9aneS3)(tpy)Cl][PF6].1.5H2O **8**

Supplement: figs2.doc [file figs2.doc]
